# Supplementary material
Source: ML conference proceedings conference paper supplement (https://openreview.net/forum?id=QK4NXtpDsk)
Supplement: supplementary_material [file attachment]

# Two-Person Interaction Augmentation with Skeleton Priors

## Supplementary Material

### 001 1. More Details on Dataset

002 One instance of the nine motions (Judo, Face-to-back, Turn-  
003 around, Hold-body, Around-the-back, Back-flip, Big-ben,  
004 Noser and Chandelle) was captured from different sub-  
005 jects by different systems. Therefore, we have two skele-  
006 tons, with 25 joints and 24 bones (Judo, Face-to-back,  
007 Turn-around and Hold-body), and 17 joints and 16 bones  
008 (Around-the-back, Back-flip, Big-ben, Noser and Chan-  
009 delle), shown in Fig. 1. The motions in D1 and D2 are  
010 shown in Fig. 2 and Fig. 3.

011 For each captured motion, we vary bones with scales  
012 within  $[0.75, 1.25]$  with a 0.05 spacing, where the origi-  
013 nal skeleton is used as the template skeleton and labeled as  
014 scale 1. An exhaustive permutation of all possible scaling is  
015 impractical. Therefore, we only use full-body uniform scal-  
016 ing and single-bone scaling on the upper-body bones which  
017 are heavily involved in interactions. We manually specify  
018 the skeleton variations and use InteractionMesh [3] to gen-  
019 erate motions.

020 InteractionMesh is an optimization framework where the  
021 required input is the original motion and the scaled target  
022 skeleton. InteractionMesh make a mesh structure by con-  
023 necting every pair of points between two characters, called  
024 interaction mesh. When adapting the motion for a desired  
025 scaled skeleton, it minimizes the Laplacian energy, i.e. a de-  
026 formation energy term of the interaction mesh, to keep the  
027 spatial relations as much as possible for every pair of joints.  
028 Using InteractionMesh, instead of hiring more actors, al-  
029 lows us to: (1) have exact control over the bone lengths; (2)  
030 explore atypical skeleton/body sizes, e.g. left arm longer  
031 than right arm. However, the optimization process is sen-  
032 sitive to initialization and weight tuning of the object func-  
033 tion. For each skeleton variation, we manually conduct sev-  
034 eral rounds of optimizations and visually inspect the quality  
035 of the generated motion, until it become satisfactory.

036 Admittedly, compared with the only dataset for interac-  
037 tions [2], the number of interactions in our dataset is smaller  
038 (9 vs 16), but our emphasis is the diversity of body sizes.  
039 Overall, we have 9 base motions, a total of 967 body varia-  
040 tions with 351045 frames, which is larger than [2] in terms  
041 of the number of sequences and frames.

### 042 2. Additional Results and Details

#### 043 2.1. Detailed experiments

044 The full comparison results of different methods for both  
045 retargeting and generation are shown in Tab. 1-Tab. 9.

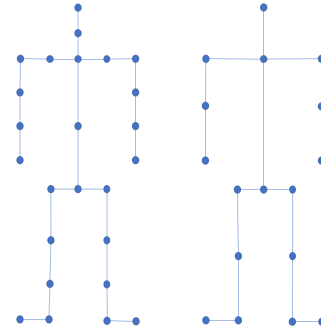

Figure 1. Two skeletons in our dataset. Left: 25 joints, Right: 17 joints

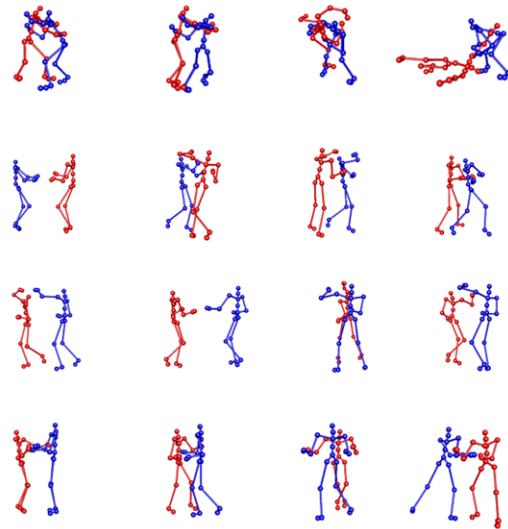

Figure 2. The base motion in D1(M1-M4). From top to bottom: Judo, Face-to-back, Turn-around and Hold-body.

#### 046 2.2. Skeletal Visualization vs Body Visualization.

047 Skeletal visualization is widely adopted in existing research  
048 (e.g. character animation, motion prediction, activity recog-  
049 nition, etc.), but we do notice a recent trend of showing  
050 body shapes with skeletal motions. Theoretically, it is possi-  
051 ble to generate body meshes e.g. via SMPL [6]. How-  
052 ever, for our problem, this is not the case because generat-  
053 ing/adapting body meshes for varying bone lengths is non-  
054 trivial and is itself an entirely different topic. Not only is  
055 there no body geometry in the data we used, but the mo-  
056 tion contains rich contacts between characters. Therefore,  
057 generated body meshes could easily lead to penetration so

| Metric | F-CNNs      | F-GCNs        | M-CNNs       | M-GCNs       | Ours        |
|--------|-------------|---------------|--------------|--------------|-------------|
| $E_r$  | 0.673/2.569 | 0.834/5.642   | 0.517/2.771  | 0.681/3.447  | 0.298/1.840 |
|        | 0.821/4.225 | 1.684/8.018   | 1.206/4.060  | 1.372/3.530  | 0.463/3.571 |
|        | 1.251/6.031 | 3.604/6.858   | 1.363/4.823  | 1.622/5.166  | 0.942/4.744 |
|        | 1.521/6.455 | 4.002/6.840   | 1.684/5.690  | 1.812/6.110  | 1.130/4.912 |
| $E_b$  | 0.093/0.355 | 0.120/0.484   | 0.109/0.835  | 0.136/0.650  | 0.072/0.270 |
|        | 0.127/1.097 | 0.135/1.067   | 0.164/1.014  | 0.158/1.270  | 0.102/0.506 |
|        | 0.234/1.214 | 0.262/1.42    | 0.273/1.449  | 0.278/1.516  | 0.189/0.763 |
|        | 0.448/1.368 | 0.403/1.653   | 0.428/1.506  | 0.418/1.834  | 0.305/1.053 |
| JPD    | 4.078       | 4.358         | 6.654        | 6.877        | 3.008       |
|        | 4.938       | 4.877         | 6.821        | 7.239        | 4.248       |
|        | 6.674       | 7.034         | 8.345        | 8.003        | 4.443       |
|        | 7.894       | 8.234         | 8.861        | 8.642        | 4.754       |
| FID    | 3.574/4.928 | 6.784/14.304  | 5.421/11.483 | 3.136/8.09   | 2.134/3.734 |
|        | 4.841/8.103 | 7.541/24.021  | 7.412/11.838 | 4.158/9.046  | 3.824/4.122 |
|        | 6.854/7.112 | 7.984/25.080  | 8.025/15.867 | 4.278/10.846 | 4.033/4.109 |
|        | 7.931/8.761 | 12.841/26.721 | 9.541/16.207 | 6.418/10.654 | 4.214/4.524 |
| $E_b$  | 0.254/0.350 | 0.365/0.569   | 0.315/0.549  | 0.228/0.518  | 0.176/0.184 |
|        | 0.621/0.925 | 0.421/0.825   | 0.512/1.480  | 0.862/0.926  | 0.285/0.423 |
|        | 0.687/1.763 | 1.654/2.276   | 1.862/2.820  | 1.923/1.947  | 0.532/0.452 |
|        | 1.325/3.081 | 2.284/3.022   | 2.684/3.424  | 2.047/5.267  | 0.737/0.769 |
| JPD    | 7.542       | 8.844         | 6.543        | 7.832        | 3.421       |
|        | 8.043       | 9.641         | 7.965        | 8.239        | 4.304       |
|        | 8.821       | 10.632        | 8.517        | 9.632        | 4.903       |
|        | 9.852       | 12.245        | 9.786        | 10.985       | 5.067       |

Table 1. Comparison on Judo retargeting (top) and generation (bottom). XX/XX are Character A/B results. All results are per joint results. The four rows in each cell are results of Random, Cross-scale, Cross-interaction and Cross-scale-interaction respectively.

manually created meshes are needed. Furthermore, since we sample different bone lengths, manual creation of body geometry for every scaled skeleton would be required, as naive non-uniform scaling on the body mesh designed for a template skeleton would easily cause mesh deformation artefacts or contact breach. Methods such as SMPL might help but with no guarantee, because arbitrary bone scaling easily leads to out-of-distribution skeletons deviating from their training data. We tested SMPL and show one such example in Fig. 4. But this does not mean our motion quality is low. The motion quality can be visually inspected in the video.

### 2.3. Generation Diversity

Our model contains 3 learned Gaussian distributions and therefore is intrinsically stochastic. We show a Judo motion sampled multiple times (in different colors) using the same skeleton in Fig. 5 (zoom-in for better visualization). While there are motion diversity, we do realize that the motions do not visually show big variations. Note that this is due to the fact that the skeleton is exactly the same for all motions, and more importantly the key interaction features such as contacts need to be maintained in different sam-

ples. These contacts implicitly act as constraints for augmentation. However, as shown before, when the bone sizes change, bigger diversities can be seen.

### 2.4. Generalizability on Reduced Training Samples

Since high-quality interaction motion is hard to capture and data augmentation is not easy, it is highly desirable if augmentation can work on as few training samples as possible. To test this, we choose Face-to-back (M2) and Big-ben (M7) under Cross-scale-interaction, and reduce the training samples to 24, to 12 and 6. More specifically, when using the scale [0.75, 0.85] and [1.15, 1.25] of M2 as the testing data, we randomly select 24, 12 and 6 training samples from the scale [0.95, 1.05] of M3-M4 for training. Similarly, when choosing the scale [0.75, 0.85] and [1.15, 1.25] of M7 as the testing data, we randomly select 24, 12 and 6 training samples from the scale [0.95, 1.05] of M8-M9 for training. Note this is a very challenging setting.

Tab. 10 shows a quantitative comparison. Note metrics have different scales and cross-metric comparison is not meaningful. Unsurprisingly, all metrics become worse when the number of training samples decreases. However, the increase of errors is slow compared with the correspond-

| Metric | F-CNNs      | F-GCNs        | M-CNNs       | M-GCNs      | Ours        |
|--------|-------------|---------------|--------------|-------------|-------------|
| $E_r$  | 0.227/0.328 | 0.445/1.474   | 0.102/0.232  | 0.424/2.760 | 0.058/0.076 |
|        | 0.234/0.335 | 0.544/1.554   | 0.124/0.372  | 1.732/3.714 | 0.263/0.425 |
|        | 0.297/0.451 | 0.548/1.573   | 0.156/0.434  | 1.988/3.876 | 0.352/0.990 |
|        | 0.725/1.812 | 0.641/1.785   | 0.921/1.932  | 4.412/5.689 | 0.630/1.472 |
| $E_b$  | 0.009/0.018 | 0.040/0.107   | 0.035/0.048  | 0.120/0.727 | 0.002/0.006 |
|        | 0.022/0.053 | 0.082/0.241   | 0.056/0.078  | 0.312/0.739 | 0.012/0.024 |
|        | 0.054/0.081 | 0.103/0.357   | 0.841/0.959  | 0.327/0.884 | 0.089/0.085 |
|        | 0.245/0.432 | 0.584/0.633   | 1.294/2.230  | 0.972/1.064 | 0.045/0.217 |
| JPD    | 0.599       | 0.517         | 0.330        | 0.465       | 0.104       |
|        | 0.658       | 0.505         | 0.414        | 0.302       | 0.241       |
|        | 0.892       | 0.703         | 0.678        | 0.526       | 0.625       |
|        | 1.284       | 1.724         | 1.595        | 0.951       | 0.845       |
| FID    | 2.637/7.218 | 21.238/37.530 | 4.825/14.917 | 1.379/2.782 | 1.134/2.304 |
|        | 3.118/8.745 | 20.457/35.483 | 5.215/14.551 | 1.751/3.451 | 1.824/2.904 |
|        | 3.331/8.286 | 25.844/38.517 | 5.466/19.651 | 2.154/3.756 | 2.533/3.621 |
|        | 5.542/9.844 | 26.723/40.425 | 7.983/24.842 | 2.831/4.237 | 2.814/3.698 |
| $E_b$  | 0.032/0.046 | 0.186/0.200   | 1.157/1.965  | 0.125/0.753 | 0.001/0.009 |
|        | 0.043/0.062 | 0.267/0.352   | 1.305/2.021  | 0.163/0.847 | 0.018/0.028 |
|        | 0.107/0.108 | 0.349/0.514   | 2.687/2.984  | 0.195/0.954 | 0.053/0.141 |
|        | 0.342/0.504 | 0.652/0.721   | 3.864/4.030  | 0.642/1.231 | 0.073/0.213 |
| JPD    | 1.017       | 3.916         | 2.469        | 0.369       | 0.101       |
|        | 1.157       | 4.148         | 2.672        | 0.454       | 0.645       |
|        | 1.872       | 6.216         | 2.896        | 0.648       | 1.004       |
|        | 1.904       | 7.385         | 4.542        | 2.034       | 1.317       |

Table 2. Comparison on Face-to-back retargeting (top) and generation (bottom). XX/XX are on Character A/B. All results are per joint results. The four rows in each cell are results of Random, Cross-scale, Cross-interaction and Cross-scale-interaction respectively.

ing experiments in retargeting and generation part , showing our method has high data efficiency. We show more results in the video.

## 2.5. Extrapolating to Large Unseen Scales

There is one example of Turn-around on 0.65 and 1.3 in the Fig. 6 , which shows that our model can extrapolate to larger skeletal variations when trained only using data on scales [0.95, 1.05]. More examples can be found in the video.

## 3. Methodology Details

### 3.1. ST-GCN Layers

Spatio-temporal Graph Convolutions (ST-GCNs) are widely used in analyzing human motions. Our construction of it is inspired by [5]. Given  $q = \{q^0, \dots, q^T\} \in \mathbb{R}^{T \times N \times 3}$ , where  $T$  is frame number of a motion,  $N$  is the number of joints and each joint location is represented by it 3D coordinates, we first construct a graph adjacency matrix  $A_n \in \mathbb{R}^{n \times n}$  of the skeleton, indicating the connectivity between joints. The spatial graph convolution of a layer can be represented as:

$$X_{i+1}^t = \text{ReLU}(A_n X_i^t W_i + X_i^t U_i) \in \mathbb{R}^{n \times h_i} \quad (1)$$

where the subscript of  $X$  is the layer index,  $t$  is a frame and  $h_i$  is the latent dimension of the layer.  $W_i$  and  $U_i$  are trainable network weights. Further the temporal convolution can be achieved by using standard 2D convolution on  $X$ . In addition, we also add one Batch Normalization layer and a ReLU layer before the 2D convolution and one more Batch Normalization layer and one Dropout layer after the 2D convolution. After combining the spatial and temporal convolution, we have one ST-GCN layer.

### 3.2. G-GRU Layers

Graph Gated Recurrent Unit Network, or G-GRU is based on standard GRU network [1], which is a Recurrent Neural Network which can model time-series data. Traditional GRU networks do not consider structured data such as graphs. A combination of GRU and Graph Neural Network

| Metric | F-CNNs       | F-GCNs        | M-CNNs        | M-GCNs      | Ours        |
|--------|--------------|---------------|---------------|-------------|-------------|
| $E_r$  | 0.454/0.874  | 0.622/1.121   | 0.334/1.244   | 1.735/2.714 | 0.398/1.754 |
|        | 0.534/0.925  | 0.751/1.334   | 0.453/1.348   | 1.956/2.819 | 0.263/2.863 |
|        | 0.796/2.071  | 0.728/1.127   | 0.879/2.941   | 2.001/2.771 | 0.352/2.936 |
|        | 1.296/2.842  | 1.121/2.254   | 1.641/3.263   | 2.942/3.234 | 0.530/3.326 |
| $E_b$  | 0.020/0.038  | 0.075/0.082   | 0.363/0.473   | 0.320/0.773 | 0.003/0.037 |
|        | 0.050/0.079  | 0.098/0.112   | 0.383/0.536   | 0.334/0.801 | 0.028/0.104 |
|        | 0.112/0.135  | 0.102/0.133   | 0.349/0.551   | 0.503/0.978 | 0.059/0.119 |
|        | 0.234/0.524  | 0.221/0.508   | 0.641/0.897   | 0.842/1.235 | 0.105/0.155 |
| JPD    | 3.359        | 2.291         | 3.765         | 2.155       | 2.274       |
|        | 3.507        | 3.814         | 4.202         | 2.261       | 2.948       |
|        | 3.741        | 4.001         | 4.268         | 3.054       | 3.147       |
|        | 4.542        | 6.123         | 4.964         | 4.637       | 3.493       |
| FID    | 6.806/7.702  | 9.037/10.487  | 9.830/11.495  | 4.407/8.824 | 3.214/7.932 |
|        | 7.023/8.112  | 10.148/12.046 | 11.049/16.839 | 4.466/8.847 | 3.854/9.258 |
|        | 7.214/8.849  | 12.645/20.984 | 12.057/18.213 | 5.121/9.157 | 3.708/9.716 |
|        | 8.678/10.845 | 13.412/23.582 | 14.325/21.842 | 6.051/9.821 | 3.923/9.803 |
| $E_b$  | 0.413/0.454  | 0.315/0.445   | 0.940/1.986   | 0.332/0.776 | 0.006/0.054 |
|        | 0.464/0.457  | 0.486/0.781   | 1.001/2.068   | 0.348/0.816 | 0.025/0.163 |
|        | 0.516/0.604  | 0.715/1.033   | 1.104/2.211   | 0.401/0.849 | 0.052/0.202 |
|        | 0.605/0.840  | 1.254/1.930   | 1.529/2.842   | 0.645/1.731 | 0.137/0.169 |
| JPD    | 3.678        | 4.120         | 4.399         | 3.206       | 2.134       |
|        | 3.845        | 4.368         | 4.501         | 4.025       | 2.872       |
|        | 4.008        | 4.808         | 4.815         | 4.419       | 3.095       |
|        | 4.845        | 5.614         | 5.325         | 5.004       | 3.317       |

Table 3. Comparison on Turn-around retargeting (top) and generation (bottom). XX/XX are on Character A/B. All results are per joint results. The four rows in each cell are results of Random, Cross-scale, Cross-interaction and Cross-scale-interaction respectively.

138 can overcome this shortcoming [5]:

$$\begin{aligned}
 139 \quad r^t &= \sigma(r_{input}(X^t)) + r_{hidden}(A_s H^t W), \\
 140 \quad u^t &= \sigma(u_{input}(X^t)) + u_{hidden}(A_s H^t W), \\
 141 \quad c^t &= \tanh(c_{input}(X^t)) + r^t \odot c_{hidden}(A_s H^t W), \\
 142 \quad H^{t+1} &= u^t H^t + (1 - u^t) \odot c^t \quad (2)
 \end{aligned}$$

143 where  $r_{input}$ ,  $u_{input}$ ,  $c_{input}$ ,  $r_{hidden}$ ,  $u_{hidden}$  and  $c_{hidden}$   
 144 are trainable functions.  $X^t$  is the input,  $H^t$  is the hidden  
 145 state at  $t$  and  $W$  is trainable weights.  $A_s$  is the adjacency  
 146 matrix.

### 147 3.3. Network Implementation and Training Details

148 The network implementation details of ST-GCN1 and G-  
 149 GRU1, including network layer configurations and archi-  
 150 tecture, are shown in Tab. 11 and Tab. 12. The network  
 151 details of ST-GCN2, ST-GCN3 and G-GRU2 are shown in  
 152 Tab.13 - Tab. 16.

153 For training, we use a batch size 32 and Adam as the op-  
 154 timizer (learning rate = 0.001) for all our experiments. We  
 155 train our model on a Nvidia Geforce RTX2080 Ti Graphics  
 156 Card. The average training time for different models is 243  
 157 minutes with training epoch = 50, and the inference time =

0.323s per motion.

## 159 4. Alternative Architectures

160 We use a frame-based Convolution Neural Networks  
 161 (CNNs) and a frame-based Graph Convolution Networks  
 162 (GCNs) as the encoders (MLP1, ST-GCN1-3) and decoders  
 163 (MLP2, G-GRU1-2) in all three VAEs denoted as F-CNNs  
 164 and F-GCNs. In addition, we also use motion-based CNNs  
 165 (M-CNNs) and GCNs (M-GCNs). The M-CNNs follow  
 166 the architecture in [4]. For M-GCNs, we mirror the GCN  
 167 encoders in ST-GCN1, ST-GCN2 and ST-GCN3, and use  
 168 them as the decoders. Due to the limited data, we did not  
 169 choose architectures that require large amounts of data such  
 170 as Transformers, Flows or Diffusion models.

171 Totally, there are four baseline networks: Frame-based  
 172 CNNs (F-CNNs), Frame-based GCNs (F-GCNs), Motion-  
 173 based CNNs (M-CNNs) and Motion-based GCNs (M-  
 174 GCNs). The detailed architectures of them are given in Tab.  
 175 17, Tab. 18, Tab. 19, and Tab. 20, respectively. Numer-  
 176 ically, our current setting significantly outperforms all the  
 177 other alternatives by as much as 66.99% in  $E_r$ , 49.42% in  
 178  $E_b$  (retargeting), 56.25% in JPD (retargeting), 72.17% in  
 179 FID, 74.82% in  $E_b$  (generation) and 61.32% in JPD (gener-

| Metric | F-CNNs       | F-GCNs        | M-CNNs      | M-GCNs      | Ours        |
|--------|--------------|---------------|-------------|-------------|-------------|
| $E_r$  | 0.230/0.258  | 0.504/1.178   | 0.077/0.289 | 0.339/0.860 | 0.098/0.284 |
|        | 0.257/0.291  | 0.604/1.258   | 0.125/0.291 | 0.458/0.909 | 0.163/0.779 |
|        | 0.304/0.345  | 0.771/1.541   | 0.201/0.294 | 0.517/0.931 | 0.252/0.982 |
|        | 0.651/0.837  | 1.204/1.976   | 0.604/0.849 | 0.915/1.677 | 0.430/1.364 |
| $E_b$  | 0.007/0.014  | 0.049/0.055   | 0.045/0.059 | 0.127/0.569 | 0.003/0.031 |
|        | 0.015/0.041  | 0.051/0.059   | 0.057/0.169 | 0.199/0.605 | 0.007/0.151 |
|        | 0.049/0.064  | 0.074/0.098   | 0.099/0.203 | 0.232/0.771 | 0.012/0.196 |
|        | 0.184/0.251  | 0.142/0.194   | 0.204/0.531 | 0.671/0.949 | 0.025/0.199 |
| JPD    | 0.617        | 2.076         | 0.807       | 1.685       | 0.264       |
|        | 0.824        | 2.148         | 0.814       | 1.694       | 0.418       |
|        | 0.835        | 2.548         | 1.215       | 1.805       | 0.589       |
|        | 1.542        | 4.287         | 2.674       | 3.004       | 0.624       |
| FID    | 3.585/8.344  | 20.815/24.261 | 0.721/3.867 | 0.322/3.513 | 0.214/2.944 |
|        | 3.748/9.424  | 21.784/28.454 | 0.915/2.245 | 1.751/2.158 | 0.854/3.442 |
|        | 3.982/9.458  | 22.511/30.368 | 1.052/2.244 | 1.981/2.752 | 0.712/4.584 |
|        | 4.874/12.828 | 23.074/29.241 | 2.452/3.657 | 3.642/3.777 | 0.923/5.265 |
| $E_b$  | 0.056/0.101  | 0.504/0.591   | 0.097/0.519 | 0.137/0.587 | 0.006/0.054 |
|        | 0.077/0.125  | 0.607/0.614   | 0.128/0.684 | 0.252/0.640 | 0.025/0.149 |
|        | 0.098/0.130  | 0.701/0.848   | 0.157/0.745 | 0.425/0.672 | 0.052/0.170 |
|        | 0.249/0.341  | 1.204/1.899   | 0.531/1.112 | 0.822/1.054 | 0.067/0.191 |
| JPD    | 1.105        | 2.217         | 1.304       | 1.707       | 0.297       |
|        | 1.235        | 2.148         | 1.365       | 1.735       | 1.071       |
|        | 1.442        | 3.331         | 1.317       | 1.844       | 1.347       |
|        | 2.140        | 4.640         | 2.384       | 2.896       | 1.915       |

Table 4. Comparison on Hold-body retargeting (top) and generation (bottom). XX/XX are on Character A/B. All results are per joint results. The four rows in each cell are results of Random, Cross-scale, Cross-interaction and Cross-scale-interaction respectively.

180 ation).

multi-person linear model. *ACM Trans. Graphics (Proc. SIG-GRAPH Asia)*, 34(6):248:1–248:16, 2015. 1

204  
205

## 181 References

- 182 [1] Kyunghyun Cho, Bart Van Merriënboer, Dzmitry Bahdanau,  
183 and Yoshua Bengio. On the properties of neural machine  
184 translation: Encoder-decoder approaches. *arXiv preprint*  
185 *arXiv:1409.1259*, 2014. 3
- 186 [2] Wen Guo, Xiaoyu Bie, Xavier Alameda-Pineda, and Francesc  
187 Moreno-Noguer. Multi-person extreme motion prediction. In  
188 *Proceedings of the IEEE/CVF Conference on Computer Vi-*  
189 *sion and Pattern Recognition (CVPR)*, pages 13053–13064,  
190 2022. 1
- 191 [3] Edmond S. L. Ho, Taku Komura, and Chiew-Lan Tai. Spa-  
192 tial relationship preserving character motion adaptation. *ACM*  
193 *Trans. Graph.*, 29(4), 2010. 1
- 194 [4] Daniel Holden, Jun Saito, and Taku Komura. A deep learning  
195 framework for character motion synthesis and editing. *ACM*  
196 *Trans. Graph.*, 35(4), 2016. 4
- 197 [5] Maosen Li, Siheng Chen, Yangheng Zhao, Ya Zhang, Yan-  
198 feng Wang, and Qi Tian. Dynamic multiscale graph neural  
199 networks for 3d skeleton based human motion prediction. In  
200 *Proceedings of the IEEE/CVF Conference on Computer Vi-*  
201 *sion and Pattern Recognition*, pages 214–223, 2020. 3, 4
- 202 [6] Matthew Loper, Naureen Mahmood, Javier Romero, Ger-  
203 ard Pons-Moll, and Michael J. Black. SMPL: A skinned

| Metric | F-CNNs      | F-GCNs       | M-CNNs      | M-GCNs      | Ours        |
|--------|-------------|--------------|-------------|-------------|-------------|
| $E_r$  | 1.586/1.614 | 2.277/4.159  | 3.120/4.384 | 1.759/4.045 | 1.153/2.797 |
|        | 1.662/4.770 | 2.282/4.342  | 3.252/4.844 | 2.201/4.349 | 1.851/3.497 |
|        | 1.976/4.824 | 2.044/4.157  | 3.924/4.121 | 2.471/4.174 | 2.252/3.882 |
|        | 2.782/5.452 | 3.451/5.735  | 4.812/6.328 | 3.421/5.418 | 3.453/4.275 |
| $E_b$  | 0.141/0.225 | 0.088/0.226  | 0.030/0.063 | 0.003/0.031 | 0.001/0.005 |
|        | 0.156/0.267 | 0.135/0.287  | 0.105/0.161 | 0.010/0.061 | 0.003/0.029 |
|        | 0.225/0.305 | 0.197/0.334  | 0.210/0.370 | 0.017/0.120 | 0.018/0.050 |
|        | 0.647/0.812 | 0.729/0.964  | 0.748/0.792 | 0.079/0.234 | 0.055/0.079 |
| JPD    | 1.844       | 3.841        | 3.525       | 0.307       | 0.398       |
|        | 2.217       | 3.428        | 3.191       | 0.941       | 0.837       |
|        | 2.618       | 3.627        | 3.224       | 1.715       | 1.672       |
|        | 3.542       | 4.521        | 4.751       | 2.642       | 2.114       |
| FID    | 0.349/0.746 | 5.142/8.672  | 1.824/1.971 | 0.337/0.584 | 0.214/1.166 |
|        | 0.662/0.997 | 5.771/9.071  | 2.054/2.642 | 0.417/0.742 | 0.854/1.712 |
|        | 1.087/1.671 | 6.041/9.817  | 2.511/2.912 | 0.661/0.942 | 1.212/1.650 |
|        | 1.574/1.942 | 8.452/10.122 | 2.981/3.514 | 0.967/1.345 | 1.723/2.071 |
| $E_b$  | 0.170/0.317 | 0.565/0.953  | 0.105/0.251 | 0.006/0.040 | 0.006/0.014 |
|        | 0.204/0.391 | 0.642/1.074  | 0.287/0.354 | 0.038/0.084 | 0.025/0.037 |
|        | 0.396/0.504 | 0.699/1.611  | 0.487/0.515 | 0.051/0.191 | 0.042/0.058 |
|        | 0.925/1.213 | 1.077/1.921  | 1.073/1.258 | 0.254/0.293 | 0.047/0.141 |
| JPD    | 2.485       | 4.253        | 3.671       | 0.345       | 0.604       |
|        | 2.671       | 4.506        | 3.851       | 1.414       | 1.157       |
|        | 3.211       | 5.011        | 4.514       | 1.892       | 1.894       |
|        | 4.359       | 5.824        | 5.942       | 2.487       | 2.268       |

Table 5. Comparison on Around-the-back motion retargeting (top) and generation (bottom). XX/XX are on Character A/B. All results are per joint results. The four rows in each cell are results of Random, Cross-scale, Cross-interaction and Cross-scale-interaction respectively.

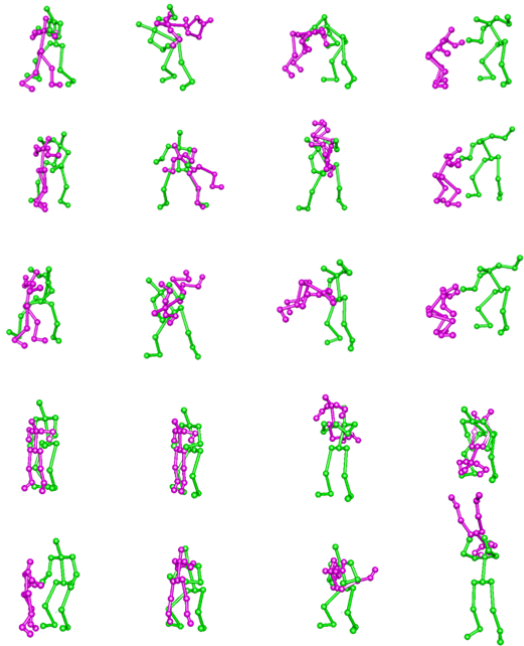

Figure 3. The base motion in D2 (M5-M9). From top to bottom: Around-the-back, Back-flip, Big-ben, Noser and Chandelle.

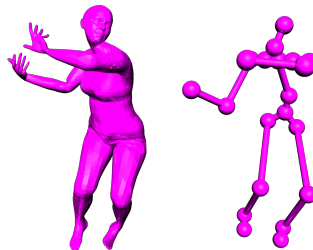

Figure 4. SMPL results on our skeleton. Left: the SMPL generated mesh. Right: the skeleton we captured in Judo motion for Character A. Due to the skeleton differences, e.g. different number of joints and different lengths of bones, severe distortion (both hands and left foot) exists in the body shape.

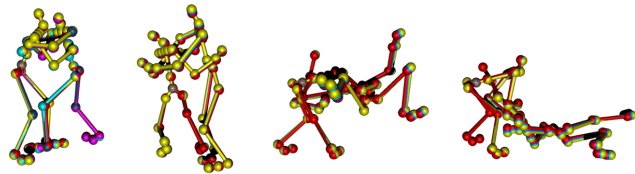

Figure 5. Generation diversity. Judo motion sampled multiple times, shown by different colors.

| Metric | F-CNNs      | F-GCNs      | M-CNNs      | M-GCNs      | Ours        |
|--------|-------------|-------------|-------------|-------------|-------------|
| $E_r$  | 1.402/4.493 | 2.015/3.483 | 2.641/3.783 | 1.501/3.142 | 1.541/2.215 |
|        | 1.427/4.025 | 2.421/3.214 | 2.453/2.924 | 1.701/3.542 | 2.511/4.719 |
|        | 1.481/4.406 | 2.812/4.082 | 2.125/3.421 | 1.412/3.199 | 3.052/4.974 |
|        | 3.214/6.643 | 3.542/6.547 | 3.895/6.852 | 4.624/8.954 | 3.453/6.299 |
| $E_b$  | 0.051/0.063 | 0.122/0.272 | 0.031/0.092 | 0.001/0.031 | 0.002/0.014 |
|        | 0.071/0.094 | 0.228/0.309 | 0.077/0.108 | 0.008/0.071 | 0.005/0.039 |
|        | 0.081/0.104 | 0.320/0.481 | 0.334/0.471 | 0.014/0.191 | 0.012/0.050 |
|        | 0.171/0.307 | 0.422/0.554 | 0.445/0.575 | 0.089/0.201 | 0.041/0.111 |
| JPD    | 0.637       | 4.123       | 4.241       | 0.480       | 0.495       |
|        | 1.734       | 4.187       | 4.651       | 1.712       | 1.163       |
|        | 2.794       | 4.914       | 4.987       | 2.923       | 2.320       |
|        | 4.045       | 5.514       | 5.612       | 3.818       | 3.762       |
| FID    | 0.283/0.806 | 5.849/6.246 | 2.421/3.841 | 0.305/0.512 | 0.424/0.952 |
|        | 0.310/0.884 | 5.244/6.121 | 2.451/3.874 | 0.540/0.917 | 0.878/1.562 |
|        | 0.711/0.976 | 6.018/6.924 | 3.084/4.312 | 0.749/1.034 | 0.912/2.134 |
|        | 1.874/1.854 | 6.684/7.896 | 4.548/4.845 | 1.342/1.837 | 1.027/2.307 |
| $E_b$  | 0.112/0.389 | 0.398/1.662 | 0.248/0.745 | 0.003/0.064 | 0.006/0.020 |
|        | 0.162/0.401 | 0.407/1.823 | 0.425/0.945 | 0.008/0.118 | 0.015/0.041 |
|        | 0.227/0.454 | 0.487/2.132 | 0.504/1.003 | 0.031/0.216 | 0.022/0.056 |
|        | 0.421/0.645 | 0.722/2.972 | 0.924/1.781 | 0.135/0.421 | 0.037/0.129 |
| JPD    | 1.510       | 5.204       | 4.312       | 1.613       | 0.624       |
|        | 1.601       | 5.405       | 4.894       | 1.819       | 1.273       |
|        | 2.718       | 5.827       | 5.181       | 3.003       | 2.024       |
|        | 4.248       | 5.922       | 6.247       | 4.252       | 3.941       |

Table 6. Comparison on Back-flip motion retargeting (top) and generation (bottom). XX/XX are on Character A/B. All results are per joint results. The four rows in each cell are results of Random, Cross-scale, Cross-interaction and Cross-scale-interaction respectively.

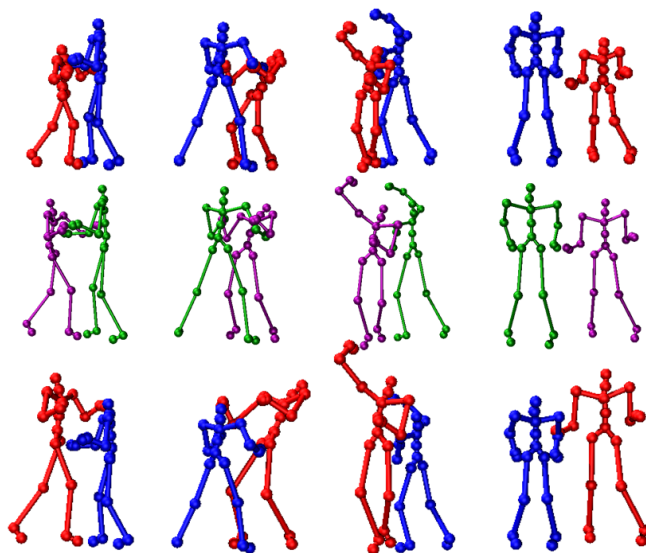

Figure 6. Large-scale extrapolation results. The skeleton of the red character is changed. The motion is Hold-body on scale 0.65 (top), original scale (mid) and scale 1.3 (bottom).

| Metric | F-CNNs       | F-GCNs      | M-CNNs       | M-GCNs        | Ours        |
|--------|--------------|-------------|--------------|---------------|-------------|
| $E_r$  | 1.691/3.948  | 2.371/4.434 | 3.013/3.212  | 1.926/4.337   | 1.621/3.871 |
|        | 3.802/8.071  | 3.427/8.724 | 3.412/8.894  | 4.016/9.711   | 2.054/8.354 |
|        | 3.914/9.221  | 3.624/9.217 | 4.642/10.945 | 5.174/10.915  | 2.752/8.544 |
|        | 5.544/10.221 | 4.052/9.826 | 4.952/10.954 | 5.204/11.065  | 2.453/9.061 |
| $E_b$  | 0.049/0.134  | 0.159/0.316 | 0.031/0.140  | 0.001/0.033   | 0.003/0.009 |
|        | 0.108/0.227  | 0.207/0.375 | 0.099/0.204  | 0.004/0.091   | 0.012/0.022 |
|        | 0.172/0.271  | 0.271/0.405 | 0.123/0.306  | 0.017/0.194   | 0.022/0.036 |
|        | 0.211/0.294  | 0.301/0.534 | 0.325/0.452  | 0.036/0.205   | 0.031/0.101 |
| JPD    | 0.956        | 3.569       | 3.356        | 0.737         | 0.495       |
|        | 0.917        | 3.453       | 3.541        | 1.571         | 1.163       |
|        | 2.127        | 4.485       | 3.941        | 2.584         | 2.320       |
|        | 2.354        | 4.755       | 4.842        | 2.948         | 3.762       |
| FID    | 0.301/1.816  | 6.833/8.771 | 0.504/2.051  | 0.472/0.520   | 0.407/0.883 |
|        | 0.651/1.971  | 7.661/8.875 | 0.571/2.364  | 0.841/1.117   | 0.841/1.465 |
|        | 0.806/2.011  | 8.054/9.404 | 0.604/2.781  | 0.894/1.199   | 0.934/2.050 |
|        | 1.068/2.325  | 8.725/9.891 | 1.262/2.934  | 1.288/1.824   | 0.939/2.011 |
| $E_b$  | 0.072/0.216  | 1.084/1.497 | 0.105/0.310  | 0.0017/0.0606 | 0.004/0.026 |
|        | 0.109/0.312  | 1.400/1.425 | 0.184/0.412  | 0.018/0.107   | 0.009/0.051 |
|        | 0.206/0.337  | 1.701/1.832 | 0.208/0.577  | 0.037/0.401   | 0.017/0.067 |
|        | 0.332/0.521  | 2.054/2.641 | 0.355/0.851  | 0.109/0.484   | 0.022/0.116 |
| JPD    | 2.072        | 5.972       | 3.451        | 0.895         | 0.702       |
|        | 2.424        | 6.422       | 3.411        | 1.718         | 2.140       |
|        | 2.672        | 7.051       | 4.823        | 1.896         | 2.320       |
|        | 2.791        | 7.455       | 6.271        | 2.942         | 2.759       |

Table 7. Comparison on Big-ben motion retargeting (top) and generation (bottom). XX/XX are on Character A/B. All results are per joint results. The four rows in each cell are results of Random, Cross-scale, Cross-interaction and Cross-scale-interaction respectively.



| Metric | F-CNNs      | F-GCNs        | M-CNNs       | M-GCNs      | Ours        |
|--------|-------------|---------------|--------------|-------------|-------------|
| $E_r$  | 1.256/4.045 | 1.853/3.997   | 2.645/4.241  | 2.736/4.360 | 0.953/3.591 |
|        | 1.864/4.689 | 2.907/5.084   | 2.756/5.601  | 2.862/5.336 | 1.638/4.610 |
|        | 2.362/4.898 | 3.015/5.915   | 3.808/6.032  | 2.991/5.617 | 1.937/4.841 |
|        | 2.623/5.185 | 3.530/6.240   | 4.810/6.937  | 3.244/6.054 | 2.223/5.719 |
| $E_b$  | 0.088/0.105 | 0.141/0.353   | 0.286/0.422  | 0.144/0.216 | 0.002/0.010 |
|        | 0.582/0.698 | 0.164/0.391   | 0.231/0.488  | 0.189/0.271 | 0.009/0.033 |
|        | 0.612/0.706 | 0.200/0.446   | 0.409/0.521  | 0.217/0.595 | 0.017/0.063 |
|        | 0.620/0.705 | 0.220/0.450   | 0.426/0.554  | 0.237/0.607 | 0.031/0.175 |
| JPD    | 3.557       | 3.792         | 5.451        | 5.670       | 0.402       |
|        | 3.804       | 3.984         | 5.669        | 6.265       | 0.964       |
|        | 4.602       | 4.205         | 6.324        | 6.618       | 1.534       |
|        | 5.552       | 5.434         | 6.729        | 6.887       | 2.341       |
| FID    | 0.624/4.578 | 10.764/12.042 | 3.011/11.084 | 0.831/2.471 | 0.297/1.055 |
|        | 2.642/3.637 | 11.684/14.587 | 3.512/12.986 | 1.986/3.076 | 0.685/2.013 |
|        | 3.186/5.804 | 15.545/22.688 | 4.336/14.745 | 3.957/4.225 | 0.907/2.435 |
|        | 4.169/7.804 | 17.550/23.821 | 5.306/16.075 | 4.580/4.904 | 1.274/4.656 |
| $E_b$  | 0.176/0.278 | 0.121/0.350   | 0.334/1.147  | 0.186/0.286 | 0.004/0.020 |
|        | 0.532/0.758 | 0.225/0.421   | 0.418/1.379  | 0.167/0.399 | 0.009/0.067 |
|        | 0.685/0.721 | 0.345/0.584   | 0.514/1.536  | 0.231/0.763 | 0.017/0.097 |
|        | 0.688/0.842 | 0.385/0.604   | 0.595/1.623  | 0.243/0.789 | 0.052/0.154 |
| JPD    | 1.116       | 2.207         | 2.914        | 2.843       | 0.634       |
|        | 2.513       | 4.741         | 5.045        | 5.157       | 1.374       |
|        | 4.895       | 5.068         | 6.861        | 6.854       | 1.862       |
|        | 5.542       | 6.068         | 7.861        | 7.560       | 2.675       |

Table 8. Comparison on Noser retargeting (top) and generation (bottom). XX/XX are Character A/B results. All results are per joint results. The four rows in each cell are results of Random, Cross-scale, Cross-interaction and Cross-scale-interaction respectively.

| Metric | F-CNNs      | F-GCNs        | M-CNNs       | M-GCNs      | Ours        |
|--------|-------------|---------------|--------------|-------------|-------------|
| $E_r$  | 0.754/4.548 | 1.696/4.302   | 0.857/4.241  | 1.733/4.346 | 0.735/3.733 |
|        | 0.930/5.288 | 1.957/4.553   | 1.263/4.914  | 1.869/4.866 | 1.328/4.542 |
|        | 1.513/5.585 | 2.013/4.9014  | 1.881/4.937  | 1.909/5.670 | 1.863/4.649 |
|        | 2.062/6.018 | 2.415/6.001   | 2.384/6.237  | 2.841/6.287 | 2.197/5.049 |
| $E_b$  | 0.018/0.102 | 0.086/0.203   | 0.082/0.222  | 0.043/0.196 | 0.003/0.007 |
|        | 0.064/0.203 | 0.184/0.334   | 0.258/0.547  | 0.134/0.220 | 0.008/0.012 |
|        | 0.127/0.259 | 0.222/0.446   | 0.299/0.687  | 0.205/0.335 | 0.015/0.031 |
|        | 0.156/0.372 | 0.252/0.474   | 0.394/0.697  | 0.229/0.385 | 0.034/0.094 |
| JPD    | 2.645       | 3.762         | 4.552        | 4.850       | 0.403       |
|        | 3.512       | 3.874         | 5.589        | 5.125       | 0.934       |
|        | 4.214       | 4.978         | 6.872        | 6.051       | 1.674       |
|        | 4.985       | 5.541         | 7.085        | 6.452       | 2.971       |
| FID    | 0.587/2.584 | 6.542/7.255   | 3.214/6.211  | 0.610/2.714 | 0.384/0.884 |
|        | 1.524/3.450 | 7.225/8.254   | 3.5124/7.986 | 1.226/3.274 | 0.571/2.253 |
|        | 2.269/4.804 | 10.542/12.457 | 3.303/9.524  | 2.957/4.545 | 0.694/2.990 |
|        | 3.542/5.274 | 13.275/17.681 | 4.656/12.865 | 4.033/5.125 | 1.250/4.458 |
| $E_b$  | 0.076/0.278 | 0.071/0.357   | 0.124/0.254  | 0.128/0.208 | 0.006/0.012 |
|        | 0.142/0.305 | 0.122/0.402   | 0.361/0.537  | 0.146/0.409 | 0.015/0.071 |
|        | 0.285/0.421 | 0.205/0.408   | 0.484/0.596  | 0.223/0.658 | 0.017/0.085 |
|        | 0.435/0.527 | 0.321/0.568   | 0.590/0.605  | 0.338/0.763 | 0.022/0.206 |
| JPD    | 4.436       | 4.258         | 5.454        | 4.954       | 0.561       |
|        | 5.452       | 5.751         | 6.592        | 6.334       | 1.259       |
|        | 5.494       | 6.006         | 6.881        | 8.454       | 1.903       |
|        | 6.899       | 8.158         | 7.461        | 9.046       | 2.842       |

Table 9. Comparison on Chandelle retargeting (top) and generation (bottom). XX/XX are Character A/B results. All results are per joint results. The four rows in each cell are results of Random, Cross-scale, Cross-interaction and Cross-scale-interaction respectively.

| Training samples |    | $E_r$ | $E_b$ | JPD   | $FID$ | $E_b$ | JPD   |
|------------------|----|-------|-------|-------|-------|-------|-------|
| M2               | 24 | 1.158 | 0.142 | 0.892 | 3.485 | 0.167 | 1.428 |
|                  | 12 | 1.347 | 0.186 | 0.963 | 3.676 | 0.192 | 1.667 |
|                  | 6  | 1.657 | 0.224 | 1.305 | 3.983 | 0.258 | 2.017 |
| M7               | 24 | 5.861 | 0.082 | 3.035 | 1.897 | 0.094 | 3.923 |
|                  | 12 | 6.025 | 0.104 | 3.879 | 1.957 | 0.123 | 4.343 |
|                  | 6  | 6.254 | 0.173 | 4.241 | 2.124 | 0.205 | 4.587 |

Table 10. Result with limited training samples. Here is the result of Face-to-back (M2) and Big-ben (M7).

| Layer index | Output channels | Dimension      | Layer                                              | Stride |
|-------------|-----------------|----------------|----------------------------------------------------|--------|
| Input       | /               | [32,T,n,4]     | /                                                  | /      |
| 1           | 32              | [32,T,n,32]    | ST-GCN                                             | 1      |
| 2           | 64              | [32,T/2,n,64]  | ST-GCN                                             | 2      |
| 3           | 128             | [32,T/4,n,128] | ST-GCN                                             | 2      |
| 4           | 256             | [32,T/8,n,256] | ST-GCN                                             | 2      |
| 5           | 256             | [32,T/8,n,256] | ST-GCN                                             | 1      |
| 6           | 256             | [32,1,n,256]   | Temporal Averaging                                 | /      |
| 7           | 262             | [32,1,n,262]   | Concatenation with $\hat{q}_B^0$ and $\hat{q}_B^T$ | /      |
| 8           | 256             | [32,1,n,256]   | Dense                                              | /      |

Table 11. Detailed architecture of ST-GCN1. T is the motion length. n is the number of joints.

| Layer Index | Input                                                            | Dimension         | Layer         |
|-------------|------------------------------------------------------------------|-------------------|---------------|
| 1           | Hidden state at time $t$                                         | $[32, 1, n, 256]$ | /             |
| 2           | $B_s, \hat{q}_B^0, \hat{q}_B^T, \text{ and } \Delta \bar{q}_B^t$ | $[32, 1, n, 10]$  | Concatenation |
| 3           | output of 1, 2                                                   | $[32, 1, n, 256]$ | G-GRU         |
| 4           | output of 3                                                      | $[32, 1, n, 256]$ | Dense         |
| 5           | output of 4                                                      | $[32, 1, n, 256]$ | Dense         |
| 6           | output of 5                                                      | $[32, 1, n, 3]$   | Dense         |

Table 12. Detailed architecture of G-GRU1. It takes as input  $z, \hat{q}_B^0$  and  $\hat{q}_B^T$  and outputs  $\Delta \bar{q}_B$ .  $n$  is the number of joints.

| Layer Index | Output channels | Dimension           | Layer              | Stride |
|-------------|-----------------|---------------------|--------------------|--------|
| Input       | /               | $[32, T, n, 3]$     | /                  | /      |
| 1           | 32              | $[32, T, n, 32]$    | ST-GCN             | 1      |
| 2           | 64              | $[32, T/2, n, 64]$  | ST-GCN             | 2      |
| 3           | 128             | $[32, T/4, n, 128]$ | ST-GCN             | 2      |
| 4           | 256             | $[32, T/8, n, 256]$ | ST-GCN             | 2      |
| 5           | 256             | $[32, T/8, n, 256]$ | ST-GCN             | 1      |
| 6           | 256             | $[32, 1, n, 256]$   | Temporal Averaging | /      |

Table 13. Detailed architecture of ST-GCN2.  $T$  is the motion length and  $n$  is the number of joints.

| Layer Index | Output channels | Dimension          | Layer              | Stride |
|-------------|-----------------|--------------------|--------------------|--------|
| Input       | /               | $[32, T, n, 8]$    | /                  | /      |
| 1           | 16              | $[32, T, n, 16]$   | ST-GCN             | 1      |
| 2           | 16              | $[32, T/2, n, 16]$ | ST-GCN             | 2      |
| 3           | 16              | $[32, T/4, n, 16]$ | ST-GCN             | 2      |
| 4           | 16              | $[32, T/8, n, 16]$ | ST-GCN             | 2      |
| 5           | 16              | $[32, T/8, n, 16]$ | ST-GCN             | 1      |
| 6           | 16              | $[32, 1, n, 16]$   | Temporal Averaging | /      |

Table 14. Detailed architecture of ST-GCN3.  $T$  is the motion length and  $n$  is the number of joints.

| Layer Index | Output channels | Dimension         | Layer                                                                                               | Stride |
|-------------|-----------------|-------------------|-----------------------------------------------------------------------------------------------------|--------|
| Input       | 278             | $[32, 1, n, 278]$ | Concatenation of outputs from the $\Delta q_A$ and $q'_B$ branches, $\hat{q}_A^0$ and $\hat{q}_A^T$ | /      |
| 1           | 256             | $[32, 1, n, 256]$ | Dense                                                                                               | /      |
| 2           | 256             | $[32, 1, n, 256]$ | Dense                                                                                               | /      |

Table 15. Detailed architecture after the ST-GCN2 and ST-GCN3.  $n$  is the number of joints. The network finally outputs  $z$ .

| Layer Index | Input                                                                     | Dimension         | Layer         |
|-------------|---------------------------------------------------------------------------|-------------------|---------------|
| 1           | Hidden state at time $t$                                                  | $[32, 1, n, 256]$ | /             |
| 2           | encoded $q'_B, \hat{q}_A^0, \hat{q}_A^T, \text{ and } \Delta \bar{q}_A^t$ | $[32, 1, n, 10]$  | Concatenation |
| 3           | output of 1, 2                                                            | $[32, 1, n, 256]$ | G-GRU         |
| 4           | output of 3                                                               | $[32, 1, n, 256]$ | Dense         |
| 5           | output of 4                                                               | $[32, 1, n, 256]$ | Dense         |
| 6           | output of 5                                                               | $[32, 1, n, 3]$   | Dense         |

Table 16. Detailed architecture of G-GRU2. It takes as the first input  $z$ , encoded  $q'_B, \hat{q}_A^0$  and  $\hat{q}_A^T$  and outputs  $\Delta \bar{q}_A$ .  $n$  is the number of joints.

| Index  | Output channels | Feature Shape | Operation                                   | Stride |
|--------|-----------------|---------------|---------------------------------------------|--------|
| Input  | /               | [32,n,3]      | /                                           | /      |
| 1      | 32              | [32,n,32]     | Conv                                        | 1      |
| 2      | 64              | [32,n/2,64]   | Conv and Maxpooling                         | 1      |
| 3      | 128             | [32,n/4,128]  | Conv and Maxpooling                         | 1      |
| 4      | 256             | [32,n/8,256]  | Conv and Maxpooling                         | 1      |
| 5      | 260             | [32,n/8,260]  | Concatenate $B_s$ and $\hat{q}_B$           | /      |
| 6      | 256             | [32,n/8,256]  | Dense                                       | /      |
| Index  | Output channels | Feature Shape | Operation                                   | Stride |
| 7      | /               | [32,n/8,260]  | Concatenate $B_s$ and $\hat{q}_B$           | /      |
| 8      | 256             | [32,n/8,256]  | Dense                                       | /      |
| 9      | 256             | [32,n/4,256]  | ConvTranspose                               | 2      |
| 10     | 128             | [32,n/2,128]  | ConvTranspose                               | 2      |
| 11     | 32              | [32,n,32]     | ConvTranspose                               | 2      |
| Output | 3               | [32,n,3]      | Dense                                       | /      |
| Index  | Output channels | Feature Shape | Operation                                   | Stride |
| Input  | /               | [32,n,3]      | /                                           | /      |
| 1      | 32              | [32,n,32]     | Conv                                        | 1      |
| 2      | 64              | [32,n/2,64]   | Conv and Maxpooling                         | 1      |
| 3      | 128             | [32,n/4,128]  | Conv and Maxpooling                         | 1      |
| 4      | 256             | [32,n/8,256]  | Conv and Maxpooling                         | 1      |
| 5      | 264             | [32,n/8,264]  | Concatenate encoding $\hat{q}_A$ and $q'_B$ | 1      |
| 6      | 256             | [32,n/8,256]  | Dense                                       | /      |
| Index  | Output channels | Feature Shape | Operation                                   | Stride |
| 7      | /               | [32,n/8,264]  | Concatenate encoding $\hat{q}_A$ and $q'_B$ | /      |
| 8      | 256             | [32,n/8,256]  | Dense                                       | /      |
| 9      | 128             | [32,n/4,128]  | ConvTranspose                               | 2      |
| 10     | 64              | [32,n/2,64]   | ConvTranspose                               | 2      |
| 11     | 32              | [32,n,32]     | ConvTranspose                               | 2      |
| Output | 3               | [32,n,3]      | Dense                                       | /      |

Table 17. F-CNNs detailed architecture in Character B (top) and Character A (bottom)

| Index  | Output channels | Feature Shape | Operation                                   | Stride |
|--------|-----------------|---------------|---------------------------------------------|--------|
| Input  | /               | [32,n,3]      | /                                           | /      |
| 1      | 32              | [32,n,32]     | GCN                                         | 1      |
| 2      | 64              | [32,n,64]     | GCN                                         | 1      |
| 3      | 84              | [32,n,84]     | Concatenate encoding $B_s$ and $\hat{q}_B$  | 1      |
| 4      | 128             | [32,n,128]    | GCN                                         | 1      |
| 5      | 256             | [32,n,256]    | GCN                                         | 1      |
| Index  | Output channels | Feature Shape | Operation                                   | Stride |
| 6      | /               | [32,n,276]    | Concatenate encoding $B_s$ and $\hat{q}_B$  | /      |
| 7      | 256             | [32,n,256]    | GCN                                         | 1      |
| 8      | 128             | [32,n,128]    | GCN                                         | 1      |
| 9      | 64              | [32,n,64]     | GCN                                         | 1      |
| 10     | 32              | [32,n,32]     | GCN                                         | 1      |
| 11     | 3               | [32,n,3]      | GCN                                         | 1      |
| Output | 3               | [32,n,3]      | Dense                                       | 1      |
| Index  | Output channels | Feature Shape | Operation                                   | Stride |
| Input  | /               | [32,n,3]      | /                                           | /      |
| 1      | 32              | [32,n,32]     | GCN                                         | 1      |
| 2      | 64              | [32,n,64]     | GCN                                         | 1      |
| 3      | 80              | [32,n,80]     | Concatenate encoding $q'_B$ and $\hat{q}_A$ | 1      |
| 4      | 128             | [32,n,128]    | GCN                                         | 1      |
| 5      | 256             | [32,n,256]    | GCN                                         | 1      |
| Index  | Output channels | Feature Shape | Operation                                   | Stride |
| 6      | /               | [32,n,272]    | Concatenate encoding $q'_B$ and $\hat{q}_A$ | /      |
| 7      | 256             | [32,n,256]    | GCN                                         | 1      |
| 8      | 128             | [32,n,128]    | GCN                                         | 1      |
| 9      | 64              | [32,n,64]     | GCN                                         | 1      |
| 10     | 32              | [32,n,32]     | GCN                                         | 1      |
| 11     | 3               | [32,n,3]      | GCN                                         | 1      |
| Output | 3               | [32,n,3]      | Dense                                       | /      |

Table 18. F-GCNs detailed architecture in Character B (top) and Character A (bottom)

| Index  | Output channels | Feature Shape | Operation                                   | Stride |
|--------|-----------------|---------------|---------------------------------------------|--------|
| Input  | /               | [32,T,n,4]    | /                                           | /      |
| 1      | 16              | [32,T,n,16]   | Conv and Maxpooling                         | 1      |
| 2      | 32              | [32,T,n,32]   | Conv and Maxpooling                         | 1      |
| 3      | 64              | [32,T,n,64]   | Conv and Maxpooling                         | 1      |
| Index  | Output channels | Feature Shape | Operation                                   | Stride |
| 4      | /               | [32,T,n,65]   | Concatenate $B_s$                           | /      |
| 5      | 64              | [32,T,n,64]   | Dense                                       | /      |
| 6      | 32              | [32,T,n,32]   | ConvTranspose                               | 1      |
| 7      | 16              | [32,T,n,16]   | ConvTranspose                               | 1      |
| Output | 3               | [32,T,n,3]    | ConvTranspose                               | 1      |
| Output | 3               | [32,T,n,3]    | Dense                                       | /      |
| Index  | Output channels | Feature Shape | Operation                                   | Stride |
| Input  | /               | [32,T,n,16]   | Concatenate encoding $\hat{q}_A$ and $q'_B$ | /      |
| 1      | 32              | [32,T,n,32]   | Conv and Maxpooling                         | 1      |
| 2      | 64              | [32,T,n,64]   | Conv and Maxpooling                         | 1      |
| Index  | Output channels | Feature Shape | Operation                                   | Stride |
| 3      | /               | [32,T,n,72]   | Concatenate encoding $\hat{q}_A$ and $q'_B$ | /      |
| 4      | 64              | [32,T,n,64]   | Dense                                       | /      |
| 5      | 32              | [32,T,n,32]   | ConvTranspose                               | 1      |
| 6      | 16              | [32,T,n,16]   | ConvTranspose                               | 1      |
| Output | 3               | [32,T,n,3]    | Dense                                       | /      |

Table 19. M-CNNs detailed architecture in Character B (top) and Character A (bottom)

| Index  | Output channels | Feature Shape | Operation                   | Stride |
|--------|-----------------|---------------|-----------------------------|--------|
| Input  | /               | [32,T,n,4]    | /                           | /      |
| 1      | 32              | [32,T,n,32]   | ST-GCN                      | 1      |
| 2      | 64              | [32,T,n,64]   | ST-GCN                      | 1      |
| 3      | 128             | [32,T,n,128]  | ST-GCN                      | 1      |
| 4      | 128             | [32,T,n,128]  | Dense                       | 1      |
| Index  | Output channels | Feature Shape | Operation                   | Stride |
| 5      | /               | [32,T,n,129]  | Concatenate $B_s$           | /      |
| 6      | 128             | [32,T,n,128]  | ST-GCN                      | 1      |
| 7      | 64              | [32,T,n,64]   | ST-GCN                      | 1      |
| 8      | 32              | [32,T,n,32]   | ST-GCN                      | 1      |
| 9      | 16              | [32,T,n,16]   | ST-GCN                      | 1      |
| Output | 3               | [32,T,n,3]    | ST-GCN                      | 1      |
| Index  | Output channels | Feature Shape | Operation                   | Stride |
| Input  | /               | [32,T,n,3]    | /                           | /      |
| 1      | 32              | [32,T,n,32]   | ST-GCN                      | 1      |
| 2      | 64              | [32,T,n,64]   | ST-GCN                      | 1      |
| 3      | 128             | [32,T,n,128]  | ST-GCN                      | 1      |
| 4      | 144             | [32,T,n,144]  | Concatenate encoding $q'_B$ | 1      |
| 5      | 128             | [32,T,n,128]  | Dense                       | 1      |
| Index  | Output channels | Feature Shape | Operation                   | Stride |
| 6      | /               | [32,T,n,144]  | Concatenate encoding $q'_B$ | /      |
| 7      | 128             | [32,T,n,128]  | ST-GCN                      | 1      |
| 8      | 64              | [32,T,n,64]   | ST-GCN                      | 1      |
| 9      | 32              | [32,T,n,32]   | ST-GCN                      | 1      |
| Output | 3               | [32,T,n,3]    | Dense                       | /      |

Table 20. M-GCNs detailed architecture in Character B (top) and Character A (bottom)
